# Supplementary material for: Training to Teach: Exploring the Feasibility of Service-Learning Projects to Prepare Undergraduate Learners to Be Community Health Educators
Source: MDPI journal article supplement (doi:10.3390/higheredu2020021), 2023-05-29
Supplement: s1 [file s1]

Supplemental Information for **Training to Teach: Exploring the Feasibility of Service-Learning Projects to Prepare Undergraduate Learners to be Community Health Educators**

**Supplement S1: Plus Delta Reflection Tool**

Date:  
Module:  
Educator:  
School/Classroom:

**Plus/Delta Reflections**

| <div><div>+</div><div>Things that worked well</div></div> | <div><div>Δ</div><div>Things to be improved</div></div> |
|-----------------------------------------------------------|---------------------------------------------------------|
|                                                           |                                                         |

| Things to consider                                       |                 |
|----------------------------------------------------------|-----------------|
| Questioning: Open-ended or closed?                       | Room set-up     |
| Learner-centeredness: Who is doing the bulk of the work? | Time management |
| Constructivism: Are the students figuring it out?        | Other           |
| Materials: are they appropriate?                         |                 |

## Supplement S2: Remote Learning Internship Grading and Feedback Form

### Remote Learning Internship Grading and Feedback Document

You will complete this form for each iteration of your online enhancement. Keep all versions together, and do not separate this document. Update it and save it to the Google Drive each time you present.

#### **Presentation One: Enhancement Pitch – Presented by Lead**

Lead:

Reviewer:

Teens CAN Lesson Assignment:

Please complete the following tasks prior to pitching your online enhancement in class:

- ☐ Read the entire lesson
- ☐ Review the compiled lesson feedback from peers
- ☐ Develop a rough idea for your online adaptation to present to the class in 5-10 minutes

In a few sentences, describe your idea for your online enhancement. You must include the following information:

- Where will the adaptation take place (before the Teens CAN lesson, after the lesson, other)
- What should the teens learn by the end of your enhancement? Choose one or two concepts.

Consider what materials you may require to create your adaptation. Describe any materials you may need to work with Lyndsey or Melanie to acquire.

Consider the feedback your peers may provide. Record one or two questions below to help prompt further discussion surrounding your idea. Prompts can include questions related to content, placement of enhancement, learning platform selection, etc.

1. Is what I am teaching or trying to teach helping the students receive the main takeaway from the enhancement

Comments:

### **Presentation Two: Rough Draft Run Through – Presented by Reviewer**

Lesson Plan Due Date (one week **before** your Reviewer must present):

The Lead should complete the following tasks prior to handing off your lesson draft to your Reviewer:

- ☐ Synthesize feedback provided by peers during presentation one and revise lesson idea
- ☐ Write up lesson plan draft and save it to the Google Drive **one week** before your Reviewer presents
- ☐ Develop and save a draft of all materials to your Google Drive folder
- ☐ Print or hand-write your lesson plan procedure. You will use this copy to take notes during the presentation on how your lesson progresses, what steps may need work, and where your reviewer struggled to understand your directions

Consider the feedback your peers provided during presentation one. What feedback, if any, did you decide to incorporate into your adaptation? Describe your reasoning below.

Review Blooms Taxonomy (in the Winter/Spring Folder) and write out your learning objective(s) below:

- 1.
- 2.

Comments:

### **Final Presentation: Enhancement Lead**

Please complete the following tasks prior to your final presentation:

- ☐ Review all Plus/Delta's on your online adaptation and integrate feedback where necessary
- ☐ Review all feedback from Lyndsey and Melanie and integrate into adaptation
- ☐ Finalize Lesson Plan
- ☐ Finalize all materials for adaptation
- ☐ Print or hand-write your lesson plan procedure. You will use this copy to take notes during the presentation on how your lesson progresses and any final edits that may need to take place

Consider the feedback your peers provided during your final presentation. What feedback, if any, did you decide to incorporate into your adaptation? Describe your reasoning below.

Reflect on the final product you created. Describe how your adaptation can be used to engage teen learners in the online classroom.

Comments:

**Supplement S3: Informal Interview Script**

Informal Exit Interview Script

1. Describe what about the project interested you and applying for the internship.
2. Describe your experience with the professional development opportunities during the internship.
3. Describe how the internship did or did not connect to your studies.
4. Describe how the internship did or did not prepare you for future opportunities after graduation
5. Describe what you enjoyed the most about the internship.
6. Describe what you would change about the internship.
7. (Year 2) How would you compare the type of collaboration that we did in this internship to the collaboration you do and other classes when you're expected to do a group work.
8. (Year 2) Describe how this online internship experience with similar or different than other online courses, you had.
